# Supplementary material for: Beliefs, Knowledge, Implementation, and Integration of Evidence-Based Practice Among Primary Health Care Providers: Protocol for a Scoping Review
Source: PubMed Central journal article supplement (PMC5558043; doi:10.2196/resprot.7727), 2017-08-01
Supplement: resprot_v6i8e148_app1.pdf [file resprot_v6i8e148_app1.pdf]

## Multimedia Appendix 1

### Draft MEDLINE - PubMed search

The following equation is an example of the search strategy without language restrictions for published and unpublished papers:

- MEDLINE PubMed (1946 to 2016)

- S1 "Evidence-based Practice" [Mesh] OR "EBP" [All fields] OR "evidence-based practice" [Mesh] OR "evidence-based practice" [tiab] OR evidence based\* [tiab] OR "evidence-based practice" [All fields]
- S2 "Health Personnel" [Mesh] OR "Physicians" [Mesh] OR "physicians\*" [tiab] OR "Nurses" [Mesh] OR "Nurses\*" [tiab] OR "Nurse Midwives" [Mesh] OR "Midwives\*" [tiab] OR "allied health occupations" [Mesh] OR "allied healthcare professionals\*" [tiab] OR "Physical therapist" [Mesh] OR "Occupational therapist" [Mesh] OR "Midwives" [Mesh] OR "allied healthcare professionals\*" [tiab] OR "Occupational Therapy" [Mesh] OR "Occupational Therapists" [Mesh] OR "occupational therapists\*" [tiab] OR  
  
"radiological technologists\*" [tiab] OR "radiologists" [tiab] OR "Radiologists" [Mesh] OR "imaging technologists\*" [tiab] OR "radiologists\*" [tiab] OR "community nurses\*" [tiab] OR "community health nursing" [Mesh] OR ("community healthcare" [tiab] AND "nurses\*" [tiab] OR "Nurse practitioners\*" [tiab] OR "Nurse Practitioners" [Mesh] OR "social workers\*" [tiab] OR "social workers" [Mesh] OR "psychologists\*" [tiab] OR "psychology" [Mesh])
- S3 "Knowledge" [Mesh] OR "Belief\*" [Mesh] OR "Implementation" [Mesh] OR EBP steps\* [tiab] "Knowledge" [Mesh] OR "health knowledge, attitudes, practice" [Mesh] OR "Knowledge" [tiab] OR "Belief" [tiab] OR "beliefs" [tiab]) AND "culture" [Mesh] NOT "religion" [Mesh] OR "implement" [All Fields] OR "implementation" [All Fileds] OR "implementing" [All Fileds]
- S4 EBP frame Surveys and Questionnaires\* [Mesh] OR "Question\*" [tiab] OR "tool\*" [tiab] OR "model\*" [tiab] OR "framework\*" [tiab] OR "Guidelines as Topic" [Mesh] OR "guideline\*" [tiab] OR "best practice\*" [tiab]
- S5 "Assessment\*" [tiab] OR "measurement\*" [tiab] OR "application\*" [tiab] OR "integration\*" [tiab]
- S6 "Primary health care" [Mesh] OR "primary care" [tiab] "primary health care" [tiab] OR "Primary Nursing" [Mesh] OR "Primary Nursing" [tiab]
- S7 S1 AND S2 AND S3 AND S4 AND S5 AND S6
