# Supplementary material for: Beliefs, Knowledge, Implementation, and Integration of Evidence-Based Practice Among Primary Health Care Providers: Protocol for a Scoping Review
Source: PubMed Central journal article supplement (PMC5558043; doi:10.2196/resprot.7727), 2017-08-01
Supplement: resprot_v6i8e148_app2.pdf [file resprot_v6i8e148_app2.pdf]

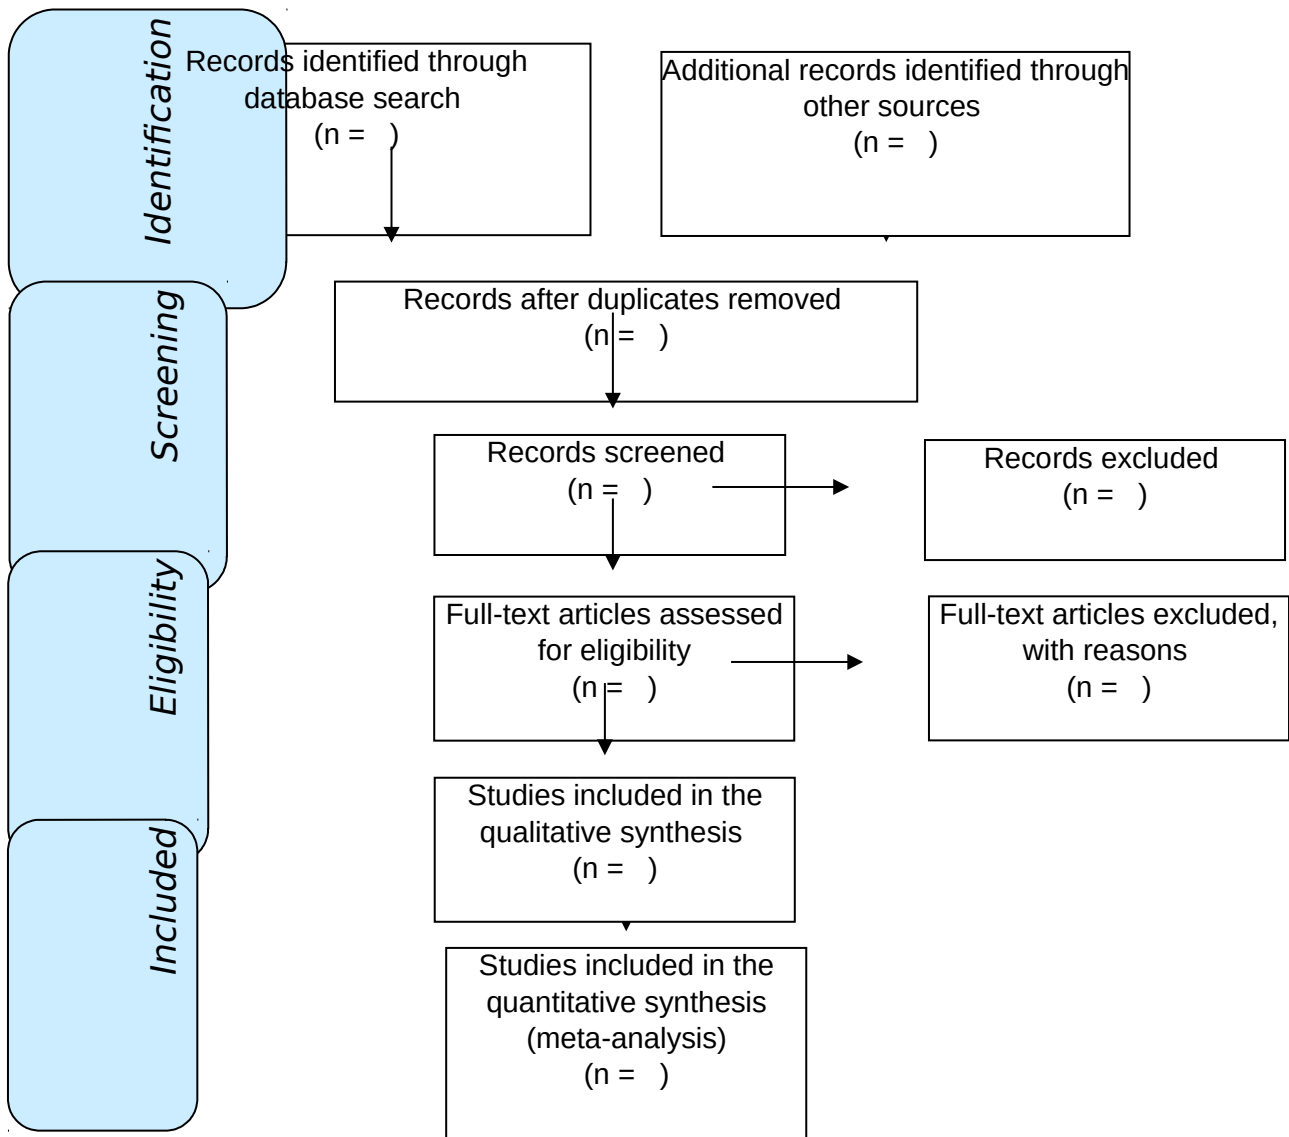

Figure 1. Flow diagram based on the PRISMA-p guidelines [41]
